# Supplementary material for: Discovering biclusters in gene expression data based on high-dimensional linear geometries
Source: Springer Nature journal article supplement (doi:10.1186/1471-2105-9-209), 2008-04-23
Supplement: 12859_2007_2194_MOESM5_ESM.pdf [file 12859_2007_2194_MOESM5_ESM.pdf]

CLL-39  
CLL-52  
CLL-13  
CLL-71;Richters  
CLL-65  
CLL-51  
CLL-14  
CLL-9  
CLL-68  
CLL-60

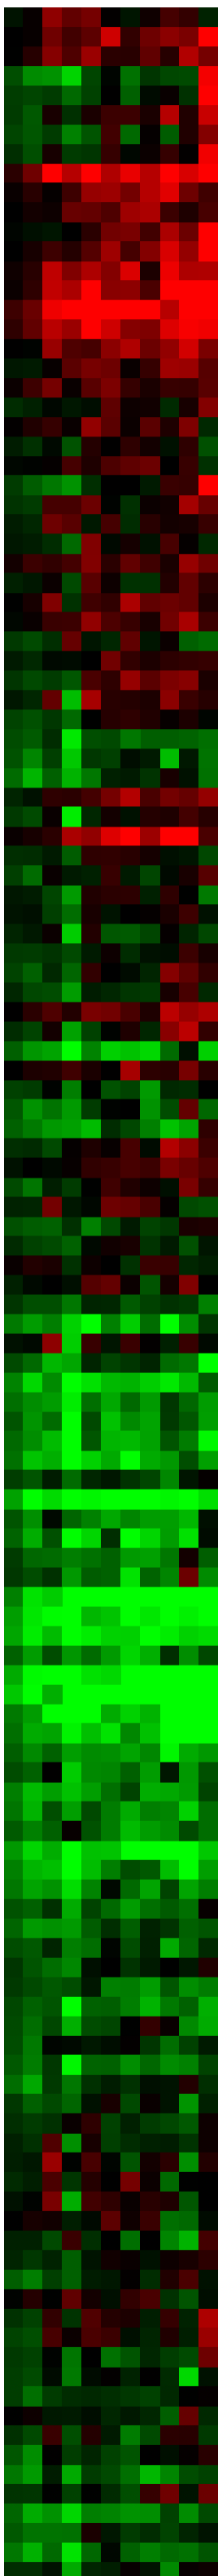

Unknown UG Hs.72045 ESTs; Clone=1268758  
Unknown; Clone=703791  
\*Unknown UG Hs.132739 Homo sapiens HIC protein mRNA, complete cds; Clone=1367394  
\*High mobility group nonhistone chromosomal protein isoforms I and Y; Clone=344413  
\*MEF2A=MADS/MEF2-family transcription factor=myocyte enhancer-binding factor 2A; Clone=298320  
\*inducible protein; Clone=1290386  
\*CD22; Clone=1234404  
\*CD79A=BCR alpha chain=mb-1; Clone=115281  
\*lyn=tyrosine kinase; Clone=193913  
Unknown UG Hs.133947 ESTs; Clone=1672025  
Unknown UG Hs.140628 ESTs; Clone=1339337  
\*KIAA0226; Clone=1336149  
Unknown; Clone=703659  
\*p27kip1=cyclin kinase inhibitor; Clone=627509  
Integrin, alpha V vitronectin receptor, alpha polypeptide, antigen CD51; Clone=301551  
\*Unknown; Clone=1338510  
Unknown; Clone=1368868  
\*Similar to KIAA0191= C2H2 zinc-finger at its N-terminal region; Clone=1351962  
Unknown UG Hs.193977 ESTs, Weakly similar to neuronal thread protein AD7c-NTP [H.sapiens]; Clone=826617  
Unknown UG Hs.124344 ESTs, Weakly similar to !!!! ALU CLASS C WARNING ENTRY !!!! [H.sapiens]; Clone=1352894  
\*KIAA0128=Similar to septin; Clone=293107  
Unknown UG Hs.231798 ESTs; Clone=827169  
\*Unknown UG Hs.172825 Homo sapiens mRNA for KIAA1037 protein, partial cds; Clone=1367802  
Unknown UG Hs.58383 ESTs; Clone=1353372  
Unknown UG Hs.25600 ESTs; Clone=1339070  
Pig12=p53-inducible gene; Clone=491213  
HU-PP-1=protein-tyrosine phosphatase; Clone=825442  
Vasopressin activated calcium mobilizing receptor-like protein; Clone=1289255  
\*Unknown UG Hs.120975 ESTs, Weakly similar to define not available 5262644 [H.sapiens]; Clone=1185293  
TRANCE=RANKL=Osteoprotegerin ligand=TNF-related ligand; Clone=825287  
\*BRCA2 region EST-1; Clone=429238  
Unknown; Clone=1370845  
\*Cyclin H; Clone=1320371  
Unknown; Clone=1339998  
\*BAP135=Bruton's tyrosine kinase-associated protein-135; Clone=1286217  
Unknown UG Hs.11463 ESTs, Weakly similar to define not available 4691541 [H.sapiens]; Clone=1320421  
\*40 kDa protein kinase related to rat ERK2; Clone=1339107  
Unknown UG Hs.144097 ESTs; Clone=1241900  
Unknown UG Hs.123283 EST; Clone=1352190  
Unknown UG Hs.105252 ESTs; Clone=1285850  
\*Similar to p130 = RB related protein; Clone=1283405  
Unknown; Clone=1355369  
Unknown; Clone=1355689  
\*Unknown UG Hs.36672 ESTs; Clone=1269317  
Unknown UG Hs.172550 polypyrimidine tract binding protein heterogeneous nuclear ribonucleoprotein I; Clone=1371619  
Unknown UG Hs.229233 EST, Moderately similar to putative p150 [H.sapiens]; Clone=1270949  
Smad4=DPC4=Homologue of Mothers Against Decapentaplegic MAD=required for TGF beta signaling=tumor suppressor in pancreatic cancer; Clone=774619  
\*Glucocorticoid receptor; Clone=1283110  
branched chain aminotransferase precursor BCATm; Clone=43773  
\*Unknown UG Hs.214455 ESTs, Weakly similar to HNK-1 sulfotransferase [R.norvegicus]; Clone=1371202  
\*histone H2A.X; Clone=1418925  
Unknown UG Hs.113759 ESTs; Clone=1353479  
Unknown; Clone=683972  
Unknown UG Hs.33054 ESTs; Clone=685710  
Unknown UG Hs.187478 ESTs; Clone=1372156  
\*Unknown UG Hs.180660 EST; Clone=1336424  
\*Unknown UG Hs.123376 EST; Clone=1337710  
\*VASP=Vasodilator-stimulated phosphoprotein=focal adhesion and microfilament-associated protein; Clone=1371613  
Unknown; Clone=LC17553  
\*OX-40; Clone=384692  
Autocrine motility factor receptor; Clone=1301814  
\*CD102=ICAM-2=intercellular adhesion molecule 2; Clone=1235170  
\*FES=FPS=Tyrosine protein kinase; Clone=1286005  
Similar to Z73581 ORF YPL225w [Saccharomyces cerevisiae]; Clone=1303644  
Unknown UG Hs.171847 ESTs; Clone=1339063  
\*Unknown UG Hs.191322 ESTs; Clone=1369117  
\*Protein phosphatase 2 formerly 2A, regulatory subunit B PR 52, alpha isoform; Clone=704413  
\*ft1=Follicular lymphoma variant translocation 1=putatively secreted protein translocated in t(2;18p11;q21 follicular lymphoma and CLL; Clone=814260  
Unknown UG Hs.120363 ESTs; Clone=1317045  
Similar to putative outer mitochondrial membrane 34 kDa translocase hTOM34; Clone=1289116  
Unknown; Clone=1355850  
\*Protein phosphatase 2 formerly 2A, catalytic subunit, alpha isoform; Clone=141688  
\*Protein phosphatase 2 formerly 2A, catalytic subunit, alpha isoform; Clone=566084  
CSF-1=Macrophage colony stimulating factor-1; Clone=1371832  
Unknown; Clone=LC18602  
\*Signal recognition particle 72 SRP72 with overlapping cam kinase II isoform; Clone=1234212  
\*G protein gamma-10 subunit; Clone=196333  
Rat translocon-associated protein delta homolog; Clone=1354406  
Unknown UG Hs.105492 ESTs; Clone=826629  
\*progesterone receptor-associated p48 protein=putative tumor suppressor SNC6; Clone=210887  
\*dUTP pyrophosphatase=deoxyuridine triphosphatase DUT; Clone=703799  
Unknown; Clone=1340158  
cell cycle protein p38-2G4 homolog hG4-1; Clone=1307238  
\*Tumor Associated Antigen L6; Clone=78113  
\*SLAP=src-like adapter protein; Clone=815774  
\*aurora/IPL1-related kinase; Clone=1357548  
Unknown; Clone=1357921  
\*DNA cytosine-5--methyltransferase; Clone=45941  
\*DNA cytosine-5--methyltransferase; Clone=1320361  
\*protein phosphatase 2A 74 kDa regulatory subunit delta or B subunit; Clone=429029  
Unknown; Clone=1355881  
\*CLPP=ATP-dependent Clp proteinase; Clone=279713  
cdc25C=M-phase inducer phosphatase 3; Clone=121066  
\*Smad6=JV15-1=Homologue of Mothers Against Decapentaplegic MAD=negative regulator of TGF beta signaling; Clone=429356  
\*IMP inosine monophosphate dehydrogenase 2; Clone=814556  
\*MAPKAP kinase 3pK; Clone=296513  
\*Casein kinase II alpha chain; Clone=1286561  
\*MLF2=myelodysplasia/myeloid leukemia factor 2; Clone=810743  
\*Host cell factor-1=VP16 transactivator interacting protein; Clone=1234225  
\*polyADP-ribose glycohydrolase; Clone=1309002  
BAT2=large proline-rich protein=MHC class III histocompatibility antigen HLA-B-associated transcript 2; Clone=746038  
\*KIAA0078=Similar to double-stranded break repair protein RAD21; Clone=1320406  
\*PPP1CB=Protein phosphatase 1, catalytic subunit, beta isoform; Clone=485729  
\*BRCA2=Mutated in breast and ovarian cancer; Clone=1340447  
BAP31= preferentially associated with membrane IgD but only weakly with membrane IgM; Clone=1242061  
\*PKA-C-ALPHA=cAMP-dependent protein kinase, alpha-catalytic subunit; Clone=245232  
\*Glycogen synthase kinase 3 beta; Clone=1183990  
\*PMS4=DNA mismatch repair protein; Clone=758206  
\*ribosomal protein L5 pseudogene; Clone=1283900  
mss4=Zn2+ binding protein/guanine nucleotide exchange factor; Clone=230857  
Acidic ribosomal phosphoprotein P2; Clone=1340095  
Similar to mitochondrial 3-ketoacyl-CoA thiolase beta-subunit of trifunctional protein; Clone=1335102  
Unknown UG Hs.120239 ESTs; Clone=1339160  
Unknown UG Hs.171228 Homo sapiens mRNA for KIAA1040 protein, partial cds; Clone=825350  
Unknown UG Hs.219237 ESTs, Highly similar to !!!! ALU SUBFAMILY SX WARNING ENTRY !!!! [H.sapiens]; Clone=1372254  
Unknown UG Hs.5735 ESTs; Clone=1283932  
\*acid finger protein; Clone=755176  
\*Unknown UG Hs.122983 ESTs; Clone=1304422  
\*MHC Class I=HLA-C4; Clone=810142  
\*MHC Class I=HLA-B27; Clone=769753  
\*MHC Class I=HLA-A2; Clone=203527  
\*Unknown UG Hs.151945 CAAX box 1; Clone=704919  
MNB=homologue of Drosophila minibrain=serine/threonine kinase; Clone=1234239  
PISSLRE = novel cdk; Clone=1351649  
\*BAK=BCL-2 family member; Clone=235938  
Unknown; Clone=1355753  
CYR61=gig1=growth-factor inducible immediate early gene product; Clone=486700  
\*FCERI=Fc epsilon receptor gamma chain=High affinity immunoglobulin epsilon receptor gamma-subunit precursor; Clone=145932  
Unknown; Clone=1672001  
\*SMRT=silencing mediator of retinoid and thyroid hormone action=corepressor; Clone=723911  
Unknown UG Hs.173945 ESTs, Moderately similar to !!!! ALU CLASS A WARNING ENTRY !!!! [H.sapiens]; Clone=711452  
Nonmusclemyosinheavychain; Clone=1302180
