# Supplementary material for: Discovering biclusters in gene expression data based on high-dimensional linear geometries
Source: Springer Nature journal article supplement (doi:10.1186/1471-2105-9-209), 2008-04-23
Supplement: 12859_2007_2194_MOESM7_ESM.pdf [file 12859_2007_2194_MOESM7_ESM.pdf]

| $x$ | $y$ | $z$ | $w$ |
|-----|-----|-----|-----|
| 1.2 | 1.2 | 1.2 | 1.2 |
| 1.2 | 1.2 | 1.2 | 1.2 |
| 1.2 | 1.2 | 1.2 | 1.2 |
| 1.2 | 1.2 | 1.2 | 1.2 |

(a)

| $x$ | $y$ | $z$ | $w$ |
|-----|-----|-----|-----|
| 1.2 | 1.2 | 1.2 | 1.2 |
| 2.0 | 2.0 | 2.0 | 2.0 |
| 1.5 | 1.5 | 1.5 | 1.5 |
| 3.0 | 3.0 | 3.0 | 3.0 |

(b)

| $x$ | $y$ | $z$ | $w$ |
|-----|-----|-----|-----|
| 1.2 | 2.0 | 1.5 | 3.0 |
| 1.2 | 2.0 | 1.5 | 3.0 |
| 1.2 | 2.0 | 1.5 | 3.0 |
| 1.2 | 2.0 | 1.5 | 3.0 |

(c)

| $x$ | $y$ | $z$ | $w$ |
|-----|-----|-----|-----|
| 1.2 | 2.2 | 0.2 | 3.2 |
| 2.0 | 3.0 | 1.0 | 4.0 |
| 1.4 | 2.4 | 0.4 | 3.4 |
| 2.4 | 3.4 | 1.4 | 4.4 |

(d)

| $x$ | $y$ | $z$ | $w$ |
|-----|-----|-----|-----|
| 1.0 | 2.0 | 0.5 | 1.5 |
| 2.0 | 4.0 | 1.0 | 3.0 |
| 1.4 | 2.8 | 0.7 | 2.1 |
| 2.4 | 4.8 | 1.2 | 3.6 |

(e)

| $x$ | $y$ | $z$ | $w$ |
|-----|-----|-----|-----|
| 1.0 | 2.1 | 0.6 | 1.7 |
| 2.0 | 4.1 | 1.1 | 3.2 |
| 1.4 | 2.9 | 0.8 | 2.3 |
| 2.4 | 4.9 | 1.3 | 3.8 |

(f)
