# Supplementary material for: Discovering biclusters in gene expression data based on high-dimensional linear geometries
Source: Springer Nature journal article supplement (doi:10.1186/1471-2105-9-209), 2008-04-23
Supplement: 12859_2007_2194_MOESM10_ESM.pdf [file 12859_2007_2194_MOESM10_ESM.pdf]

CL-39  
 CL-52  
 CL-51  
 CL-71  
 CL-13  
 CL-15  
 CL-14  
 CL-18  
 CL-60  
 CL-66

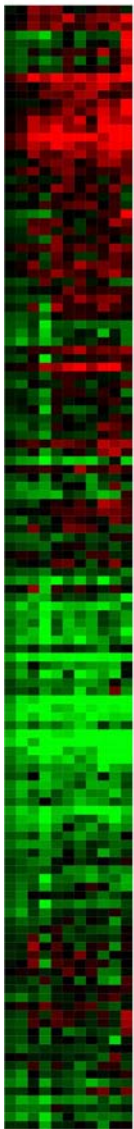

Unknown UG Hs.72045 ESTs: Clone=1268758  
 Unknown: Clone=703791  
 \*Unknown UG Hs.135739 Homo sapiens HIC protein mRNA, complete cds; Clone=1367394  
 \*High mobility group nonhistone chromosomal protein isoforms I and Y; Clone=344413  
 \*MEF2A-MAD3/MEF2-family transcription factor-mycocyte enhancer-binding factor 2A; Clone=298320  
 \*Inducible protein; Clone=1290386  
 \*CD22; Clone=1234404  
 \*CD79A=BCR alpha chain=mbp-1; Clone=115281  
 \*Tyr-tyrosine kinase; Clone=150913  
 Unknown UG Hs.133947 ESTs: Clone=1672025  
 Unknown UG Hs.140629 ESTs: Clone=1339337  
 \*KIAA0226; Clone=1336149  
 Unknown: Clone=103659  
 \*p27kip1=cyclin kinase inhibitor; Clone=627509  
 \*Integrin, alpha V vitronectin receptor, alpha polypeptide, antigen CD51; Clone=301551  
 \*Unknown: Clone=1338510  
 Unknown: Clone=1368860  
 \*Similar to KIAA0191 a C2H2 zinc-finger at its N-terminal region; Clone=1351962  
 Unknown UG Hs.193377 ESTs: Weakly similar to neuronal thread protein AD7c-NTP [H.sapiens]; Clone=826617  
 Unknown UG Hs.124344 ESTs: Weakly similar to !!! ALU CLASS C WARNING ENTRY !!! [H.sapiens]; Clone=1352984  
 \*KIAA0128=Similar to sepin; Clone=293107  
 Unknown UG Hs.231798 ESTs: Clone=827169  
 \*Unknown UG Hs.172825 Homo sapiens mRNA for KIAA1037 protein, partial cds; Clone=1367802  
 Unknown UG Hs.150383 ESTs: Clone=1353322  
 Unknown UG Hs.25600 ESTs: Clone=1339070  
 \*Pip2-5-phosphate-inducible gene; Clone=491213  
 \*HU-PP-1=protein-tyrosine phosphatase; Clone=825442  
 \*Vasopressin activated calcium mobilizing receptor-like protein; Clone=1289255  
 \*Unknown UG Hs.120975 ESTs: Weakly similar to define not available 5262644 [H.sapiens]; Clone=1185293  
 \*TNFAC2=TNF $\alpha$ -Osteoprotegerin ligand-TNF-related ligand; Clone=825287  
 \*BRCA2 region EST-1; Clone=429238  
 Unknown: Clone=1375945  
 \*Cyclin H; Clone=1320371  
 Unknown: Clone=1339998  
 \*BAP138=Bruton's tyrosine kinase-associated protein-135; Clone=1286217  
 Unknown UG Hs.11463 ESTs: Weakly similar to define not available 4691541 [H.sapiens]; Clone=1320421  
 \*40 kDa protein kinase related to rat ERK2; Clone=1339107  
 Unknown UG Hs.144097 ESTs: Clone=1241900  
 Unknown UG Hs.123283 EST: Clone=1352190  
 Unknown UG Hs.105252 ESTs: Clone=1285850  
 \*Similar to p130 = RB related protein; Clone=1283405  
 Unknown: Clone=1355369  
 Unknown: Clone=1355699  
 \*Unknown UG Hs.36672 ESTs: Clone=1269317  
 \*Unknown UG Hs.172593 EST: polyuridylylase tract binding protein heterogeneous nuclear ribonucleoprotein I; Clone=1371619  
 Unknown UG Hs.229233 EST: Moderately similar to putative p150 [H.sapiens]; Clone=1270949  
 \*Simad=DFCC1=Homolog of Mothers Against Decapentaplegic MAD=required for TGF beta signaling=tumor suppressor in pancreatic cancer; Clone=774619  
 \*Glucocorticoid receptor; Clone=1283110  
 \*Unknown UG Hs.120929 EST: precursor of BCATm; Clone=43373  
 \*Unknown UG Hs.124455 ESTs: Weakly similar to HNK-1 sulfotransferase [R.norvegicus]; Clone=1371202  
 \*Histone H2A.X; Clone=1418925  
 Unknown UG Hs.131789 ESTs: Clone=1353479  
 Unknown: Clone=683972  
 Unknown UG Hs.330354 ESTs: Clone=685710  
 Unknown UG Hs.187478 ESTs: Clone=1372156  
 Unknown UG Hs.180860 EST: Clone=136424  
 \*Unknown UG Hs.123376 EST: Clone=1337710  
 \*VASP=Vasodilator-stimulated phosphoprotein=focal adhesion and microfilament-associated protein; Clone=1371613  
 Unknown: Clone=LC17553  
 \*CX-40; Clone=35462  
 Autocrine motility factor receptor; Clone=1301814  
 \*CD103=ICAM-2=intercellular adhesion molecule 2; Clone=1235170  
 \*FES=FPS=Tyrosine protein kinase; Clone=1286005  
 \*Similar to ZF351 CRE YPL225W [Saccharomyces cerevisiae]; Clone=1303644  
 Unknown UG Hs.171847 ESTs: Clone=1339063  
 \*Unknown UG Hs.191322 ESTs: Clone=1369117  
 \*Protein phosphatase 2 formerly 2A, regulatory subunit B PR 52, alpha isoform; Clone=704413  
 \*Tvt1=Ovarian lymphoma variant translocation 1=putatively secreted protein translocated in t2,1p11;q21 follicular lymphoma and CLL; Clone=814260  
 Unknown UG Hs.120363 ESTs: Clone=1317045  
 \*Similar to putative outer mitochondrial membrane 34 kDa translocase hTOM34; Clone=1289116  
 Unknown: Clone=1358800  
 \*Protein phosphatase 2 formerly 2A, catalytic subunit, alpha isoform; Clone=141688  
 \*Protein phosphatase 2 formerly 2A, catalytic subunit, alpha isoform; Clone=566084  
 \*CSF-1=Macrophage colony stimulating factor-1; Clone=1371832  
 Unknown: Clone=LC18602  
 \*Signal recognition particle 72 SRP72 with overlapping cam kinase II isoform; Clone=1234212  
 \*G protein gamma-10  
 \*Rat translocin-associated protein delta homolog; Clone=1354406  
 \*GTP pyrophosphatase-deoxyuridine triphosphatase DUT; Clone=703799  
 \*Progesterone receptor-associated p48 protein=putative tumor suppressor SNGC; Clone=210887  
 \*Cell cycle protein p38-CGA homolog hC4-1; Clone=1307238  
 \*Tumor Associated Antigen L6; Clone=78113  
 \*SLAP=src-like adapter protein; Clone=815774  
 \*Leucine-rich related kinase; Clone=1357549  
 Unknown: Clone=1357921  
 \*DNA cytosine-5-methyltransferase; Clone=45941  
 \*DNA cytosine-5-methyltransferase; Clone=1320361  
 \*Protein phosphatase 2A 74 kDa regulatory subunit delta or B subunit; Clone=429029  
 Unknown: Clone=1355881  
 \*CLIPF=ATP-dependent Clp proteinase; Clone=279713  
 \*csrc25c=M-phase inducer phosphatase 3; Clone=121066  
 \*Simad=DFCC1=Homolog of Mothers Against Decapentaplegic MAD=negative regulator of TGF beta signaling; Clone=429356  
 \*IMP inosine monophosphate dehydrogenase 2; Clone=814556  
 \*MAPKAP kinase 3K; Clone=296513  
 \*Casein kinase II alpha chain; Clone=1286561  
 \*MLF2=myeloid/lymphoid leukemia factor 2; Clone=810743  
 \*Hcst cell factor-1=V16 transactivator interacting protein; Clone=1234225  
 \*epcADP-ribose glycohydrolase; Clone=1309002  
 \*BA12=large protein-6b protein-MHC class III histocompatibility antigen HLA-B-associated transcript 2; Clone=746038  
 \*KIAA0078=Similar to double-stranded break repair protein RAD21; Clone=1320406  
 \*PSP1CB=Protein phosphatase 1, catalytic subunit, beta isoform; Clone=485729  
 \*BRCA2=Mutated in breast and ovarian cancer; Clone=1340447  
 \*BAR21= preferentially associated with membrane IgD but only weakly with membrane IgM; Clone=1242061  
 \*PKA-C-ALPHA-cAMP-dependent protein kinase, alpha-catalytic subunit; Clone=245232  
 \*Glycogen synthase kinase 3 beta; Clone=1182969  
 \*PM54=DNA mismatch repair protein; Clone=756206  
 \*Ribosomal protein L5 pseudogene; Clone=1262909  
 \*msa4=Zn<sup>2+</sup> binding protein/guanine nucleotide exchange factor; Clone=230857  
 \*Acidic ribosomal phosphoprotein P2; Clone=1340295  
 \*Similar to mitochondrial 3-ketoacyl-CoA thiolase beta-subunit of trifunctional protein; Clone=1335102  
 Unknown UG Hs.120238 ESTs: Clone=1339160  
 Unknown UG Hs.171228 Homo sapiens mRNA for KIAA1040 protein, partial cds; Clone=825350  
 Unknown UG Hs.219237 ESTs: Highly similar to !!! ALU SUBFAMILY SX WARNING ENTRY !!! [H.sapiens]; Clone=1372254  
 Unknown UG Hs.5732 ESTs: Clone=1283932  
 \*acid finger protein; Clone=755176  
 Unknown UG Hs.127863 ESTs: Clone=1304422  
 \*MHC Class I=HLA-C4; Clone=810142  
 \*MHC Class I=HLA-B\*27; Clone=769793  
 \*MHC Class I=HLA-A2; Clone=203527  
 Unknown UG Hs.191945 CAAX box 1; Clone=704919  
 \*MNB=homologue of Desophila nimistrai=serine/threonine kinase; Clone=1234239  
 \*PUS1RE = novel protein; Clone=1351649  
 \*BAK=BCL-2 family member; Clone=235938  
 Unknown: Clone=1357753  
 \*CYR61=gg1growth-factor inducible immediate early gene product; Clone=486700  
 \*FCER1=1 epsilon receptor gamma chain=High affinity immunoglobulin epsilon receptor gamma-subunit precursor; Clone=145932  
 Unknown: Clone=1672001  
 \*SMART=enhancing mediator of retinoid and thyroid hormone action=corepressor; Clone=723911  
 Unknown UG Hs.173945 ESTs: Moderately similar to !!! ALU CLASS A WARNING ENTRY !!! [H.sapiens]; Clone=711452  
 Nonmusclemyosin heavy chain; Clone=1302180

(a) (For a full size image, please see Additional File 5)

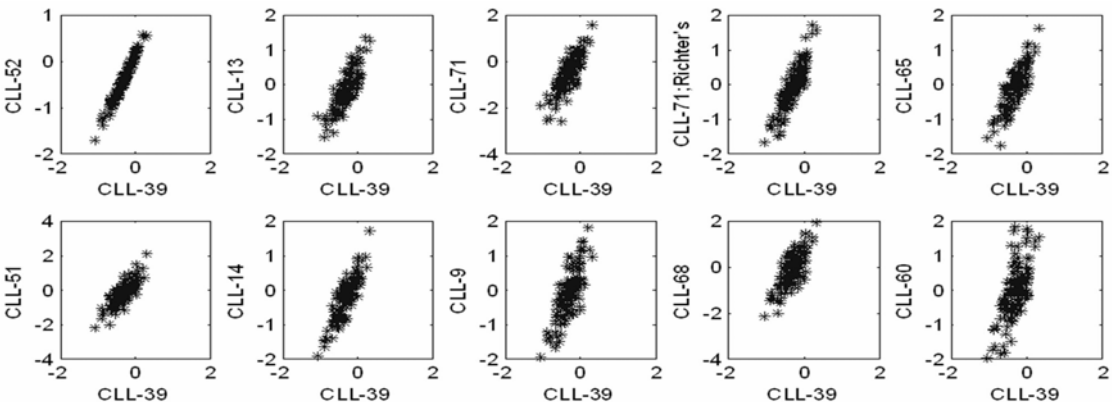

(b)
