# Supplementary material for: Discovering biclusters in gene expression data based on high-dimensional linear geometries
Source: Springer Nature journal article supplement (doi:10.1186/1471-2105-9-209), 2008-04-23
Supplement: 12859_2007_2194_MOESM11_ESM.pdf [file 12859_2007_2194_MOESM11_ESM.pdf]

| Gene Ontology term              | Cluster frequency          | Genome frequency of use        | Corrected P-value | Genes annotated to the term                                                                                                                                                                                                                                                                                                                                                                                                                                                                                                                                                                                                                                                                                                                                                                                                                                                                                                                                                                                                                                                                                                                                        |
|---------------------------------|----------------------------|--------------------------------|-------------------|--------------------------------------------------------------------------------------------------------------------------------------------------------------------------------------------------------------------------------------------------------------------------------------------------------------------------------------------------------------------------------------------------------------------------------------------------------------------------------------------------------------------------------------------------------------------------------------------------------------------------------------------------------------------------------------------------------------------------------------------------------------------------------------------------------------------------------------------------------------------------------------------------------------------------------------------------------------------------------------------------------------------------------------------------------------------------------------------------------------------------------------------------------------------|
| <a href="#">protein binding</a> | 45 out of 100 genes, 45.0% | 6892 out of 33697 genes, 20.5% | 2.80e-06          | <a href="#">Q02078</a> , <a href="#">O60216</a> , <a href="#">Q86SE9</a> , <a href="#">Q93034</a> , <a href="#">P62140</a> , <a href="#">Q14738</a> , <a href="#">O43541</a> , <a href="#">O14965</a> , <a href="#">O00622</a> , <a href="#">O14788</a> , <a href="#">Q13627</a> , <a href="#">P48634</a> , <a href="#">P35579</a> , <a href="#">Q13239</a> , <a href="#">P13598</a> , <a href="#">P51610</a> , <a href="#">P06756</a> , <a href="#">P26599</a> , <a href="#">Q9Y618</a> , <a href="#">Q96T23</a> , <a href="#">P46527</a> , <a href="#">P04150</a> , <a href="#">P26358</a> , <a href="#">P16104</a> , <a href="#">Q12899</a> , <a href="#">P63151</a> , <a href="#">P51572</a> , <a href="#">P51587</a> , <a href="#">Q93009</a> , <a href="#">P30273</a> , <a href="#">Q14141</a> , <a href="#">P30307</a> , <a href="#">P17612</a> , <a href="#">P28482</a> , <a href="#">P20273</a> , <a href="#">P67775</a> , <a href="#">P50502</a> , <a href="#">P68400</a> , <a href="#">Q16611</a> , <a href="#">Q96L94</a> , <a href="#">P17096</a> , <a href="#">P07948</a> , <a href="#">Q08999</a> , <a href="#">Q9UQ80</a> , <a href="#">P49841</a> |

| Gene Ontology term                                     | Cluster frequency          | Genome frequency of use        | Corrected P-value | Genes annotated to the term                                                                                                                                                                                                                                                                                                                                                                                                                                                                                                                                                                                                                                                                                                                                                                                                                                                                                                                                                                                                                                                                                                               |
|--------------------------------------------------------|----------------------------|--------------------------------|-------------------|-------------------------------------------------------------------------------------------------------------------------------------------------------------------------------------------------------------------------------------------------------------------------------------------------------------------------------------------------------------------------------------------------------------------------------------------------------------------------------------------------------------------------------------------------------------------------------------------------------------------------------------------------------------------------------------------------------------------------------------------------------------------------------------------------------------------------------------------------------------------------------------------------------------------------------------------------------------------------------------------------------------------------------------------------------------------------------------------------------------------------------------------|
| <a href="#">nucleus</a>                                | 36 out of 100 genes, 36.0% | 5613 out of 33697 genes, 16.7% | 0.00014           | <a href="#">Q02078</a> , <a href="#">O60216</a> , <a href="#">Q14738</a> , <a href="#">Q15773</a> , <a href="#">P30085</a> , <a href="#">O14965</a> , <a href="#">Q13627</a> , <a href="#">P48634</a> , <a href="#">Q86W56</a> , <a href="#">P35579</a> , <a href="#">P51946</a> , <a href="#">P51610</a> , <a href="#">Q14140</a> , <a href="#">P26599</a> , <a href="#">Q9Y618</a> , <a href="#">Q96T23</a> , <a href="#">P46527</a> , <a href="#">P04150</a> , <a href="#">P26358</a> , <a href="#">P16104</a> , <a href="#">Q16644</a> , <a href="#">Q9H777</a> , <a href="#">Q5SXM1</a> , <a href="#">Q8N5Y2</a> , <a href="#">Q75QN2</a> , <a href="#">P51587</a> , <a href="#">Q93009</a> , <a href="#">P30307</a> , <a href="#">P17612</a> , <a href="#">P67775</a> , <a href="#">Q9P1T7</a> , <a href="#">P17096</a> , <a href="#">P07948</a> , <a href="#">P33316</a> , <a href="#">Q08999</a> , <a href="#">Q9UQ80</a>                                                                                                                                                                                                         |
| <a href="#">intracellular membrane-bound organelle</a> | 44 out of 100 genes, 44.0% | 7867 out of 33697 genes, 23.3% | 0.00022           | <a href="#">Q02078</a> , <a href="#">O60216</a> , <a href="#">Q9BZ23</a> , <a href="#">Q14738</a> , <a href="#">Q15773</a> , <a href="#">O15382</a> , <a href="#">P30085</a> , <a href="#">O14965</a> , <a href="#">Q13627</a> , <a href="#">P48634</a> , <a href="#">Q86W56</a> , <a href="#">P35579</a> , <a href="#">Q06136</a> , <a href="#">P51946</a> , <a href="#">P51610</a> , <a href="#">Q14140</a> , <a href="#">P26599</a> , <a href="#">Q8WVM8</a> , <a href="#">Q9Y618</a> , <a href="#">Q96T23</a> , <a href="#">P46527</a> , <a href="#">P04150</a> , <a href="#">P26358</a> , <a href="#">P16104</a> , <a href="#">Q16644</a> , <a href="#">Q9H777</a> , <a href="#">Q5SXM1</a> , <a href="#">Q8N5Y2</a> , <a href="#">P51572</a> , <a href="#">P51587</a> , <a href="#">Q75QN2</a> , <a href="#">Q93009</a> , <a href="#">P30307</a> , <a href="#">P51571</a> , <a href="#">P17612</a> , <a href="#">P67775</a> , <a href="#">Q9P1T7</a> , <a href="#">Q16740</a> , <a href="#">Q8N983</a> , <a href="#">P17096</a> , <a href="#">P07948</a> , <a href="#">P33316</a> , <a href="#">Q08999</a> , <a href="#">Q9UQ80</a> |
| <a href="#">membrane-bound organelle</a>               | 44 out of 100 genes, 44.0% | 7869 out of 33697 genes, 23.4% | 0.00022           | <a href="#">Q02078</a> , <a href="#">O60216</a> , <a href="#">Q9BZ23</a> , <a href="#">Q14738</a> , <a href="#">Q15773</a> , <a href="#">O15382</a> , <a href="#">P30085</a> , <a href="#">O14965</a> , <a href="#">Q13627</a> , <a href="#">P48634</a> , <a href="#">Q86W56</a> , <a href="#">P35579</a> , <a href="#">Q06136</a> , <a href="#">P51946</a> , <a href="#">P51610</a> , <a href="#">Q14140</a> , <a href="#">P26599</a> , <a href="#">Q8WVM8</a> , <a href="#">Q9Y618</a> , <a href="#">Q96T23</a> , <a href="#">P46527</a> , <a href="#">P04150</a> , <a href="#">P26358</a> , <a href="#">P16104</a> , <a href="#">Q16644</a> , <a href="#">Q9H777</a> , <a href="#">Q5SXM1</a> , <a href="#">Q8N5Y2</a> , <a href="#">P51572</a> , <a href="#">P51587</a> , <a href="#">Q75QN2</a> , <a href="#">Q93009</a> , <a href="#">P30307</a> , <a href="#">P51571</a> , <a href="#">P17612</a> , <a href="#">P67775</a> , <a href="#">Q9P1T7</a> , <a href="#">Q16740</a> , <a href="#">Q8N983</a> , <a href="#">P17096</a> , <a href="#">P07948</a> , <a href="#">P33316</a> , <a href="#">Q08999</a> , <a href="#">Q9UQ80</a> |
