# Supplementary material for: Discovering biclusters in gene expression data based on high-dimensional linear geometries
Source: Springer Nature journal article supplement (doi:10.1186/1471-2105-9-209), 2008-04-23

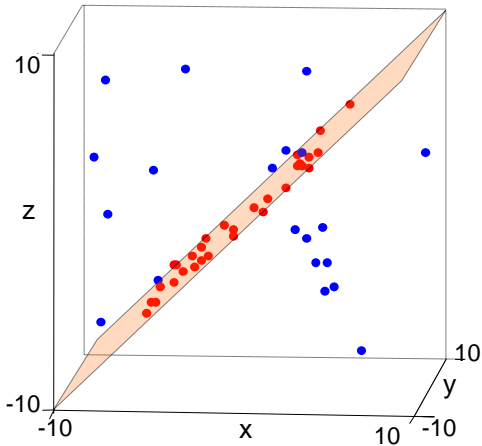

Supplement: 12859_2007_2194_MOESM12_ESM.pdf [file 12859_2007_2194_MOESM12_ESM.pdf]
